# Supplementary material for: Resolution of severe hyponatraemia is associated with improved survival in patients with cancer
Source: PubMed Central journal article supplement (PMC4381411; doi:10.1186/s12885-015-1156-6), 2015-03-22
Supplement: 12885_2015_1156_MOESM1_ESM.pdf [file 12885_2015_1156_MOESM1_ESM.pdf]

Additional File 1: Clinical data of patients with severe hyponatraemia ( $\text{Na}^+ < 115 \text{ mmol/L}$ )

| Urea (mmol/L) | Creatinine (mmol/L) | Primary tumour site | Clinical Volume status | Treatment of Hyponatraemia | Biochemistry consistent with SIADH <sup>1</sup> | Urine $\text{Na}^+ > 40 \text{ mmol/L}$ |
|---------------|---------------------|---------------------|------------------------|----------------------------|-------------------------------------------------|-----------------------------------------|
| 2.3           | 47                  | Breast              | Unknown                | Unknown <sup>2</sup>       | Yes                                             | No                                      |
| 6.7           | 84                  | Breast              | Unknown                | Unknown <sup>2</sup>       | Unknown                                         | Unknown                                 |
| 2.0           | 42                  | Lymphoma            | Unknown                | Unknown <sup>2</sup>       | Unknown                                         | Unknown                                 |
| 5.3           | 69                  | Lung                | Unknown                | Unknown <sup>2</sup>       | Yes                                             | No                                      |
| 14.9          | 99                  | Pancreas            | Unknown                | demeclocycline             | Yes                                             | Unknown                                 |
| 10.8          | 143                 | CUP <sup>3</sup>    | Unknown                | Unknown <sup>2</sup>       | Yes                                             | Unknown                                 |
| 6.6           | 57                  | Lymphoma            | Unknown                | Fluid restriction          | Yes                                             | Yes                                     |
| 7.7           | 111                 | endometrium         | Unknown                | Unknown <sup>2</sup>       | Unknown                                         | Unknown                                 |
| 4.0           | 43                  | Prostate            | Unknown                | Unknown <sup>2</sup>       | Yes                                             | Yes                                     |
| 3.1           | 64                  | Head and neck       | Unknown                | Unknown <sup>2</sup>       | Unknown                                         | Unknown                                 |
| 7.7           | 9                   | Breast              | Unknown                | None                       | Yes                                             | Unknown                                 |
| 13.8          | 100                 | Ovary               | Hypovolaemic           | IV saline                  | N/A                                             | Unknown                                 |
| 9.2           | 56                  | Breast              | Unknown                | Unknown <sup>2</sup>       | Yes                                             | No                                      |
| 3.4           | 77                  | Myeloma             | Unknown                | Unknown <sup>2</sup>       | Yes                                             | No                                      |
| 0.9           | 34                  | Lung                | Unknown                | demeclocycline             | Unknown                                         | Unknown                                 |
| 20.4          | 163                 | Melanoma            | Unknown                | Unknown <sup>2</sup>       | Yes                                             | Unknown                                 |
| 7.3           | 65                  | Other               | Unknown                | Unknown <sup>2</sup>       | Yes                                             | Yes                                     |
| 3.9           | 65                  | Breast              | Hypovolaemic           | Fluid restriction          | N/A                                             | No                                      |
| 3.2           | 59                  | Head and neck       | Unknown                | Fluid restriction          | Yes                                             | No                                      |
| 28.9          | 203                 | Colorectal          | Hypovolaemic           | IV saline                  | N/A                                             | Yes                                     |
| 3.9           | 68                  | Lymphoma            | Unknown                | Unknown <sup>2</sup>       | Yes                                             | No                                      |
| 3.3           | 55                  | Colorectal          | Unknown                | Unknown <sup>2</sup>       | Unknown                                         | Unknown                                 |

|      |     |                    |               |                                       |         |         |
|------|-----|--------------------|---------------|---------------------------------------|---------|---------|
| 94.2 | 325 | Bladder            | Unknown       | Unknown <sup>2</sup>                  | Unknown | Yes     |
| 6.5  | 89  | Cholangiocarcinoma | Unknown       | Unknown <sup>2</sup>                  | Yes     | No      |
| 4.3  | 50  | Gastric            | Unknown       | Unknown <sup>2</sup>                  | Unknown | Unknown |
| 3.1  | 49  | Pancreas           | Hypovolaemic  | IV saline                             | N/A     | No      |
| 27.7 | 357 | CUP <sup>3</sup>   | Unknown       | Unknown <sup>2</sup>                  | Unknown | Unknown |
| 15.6 | 99  | Colorectal         | Unknown       | IV saline                             | Unknown | Unknown |
| 4.2  | 59  | Lung               | Unknown       | Unknown <sup>2</sup>                  | Yes     | No      |
| 5.2  | 92  | Renal              | Unknown       | Fluid restriction                     | Yes     | Yes     |
| 9.7  | 105 | CUP <sup>3</sup>   | Unknown       | Unknown <sup>2</sup>                  | No      | No      |
| 2.1  | 47  | Lung               | Unknown       | Fluid restriction                     | Yes     | Unknown |
| 3.6  | 40  | Lung               | Unknown       | Fluid restriction +<br>demeclocycline | Yes     | Unknown |
| 5.1  | 118 | Pancreas           | Unknown       | Unknown <sup>2</sup>                  | Yes     | Yes     |
| 5.0  | 53  | Pancreas           | Unknown       | Unknown <sup>2</sup>                  | Unknown | Unknown |
| 2.8  | 67  | Lung               | Unknown       | Fluid restriction +<br>demeclocycline | Yes     | No      |
| 3.0  | 38  | Lung               | Unknown       | Unknown <sup>2</sup>                  | Unknown | Unknown |
| 7.3  | 57  | Sarcoma            | Unknown       | IV saline                             | Yes     | Unknown |
| 9.3  | 53  | Colorectal         | Unknown       | Unknown <sup>2</sup>                  | Unknown | Unknown |
| 4.0  | 65  | Leukaemia          | Unknown       | Unknown <sup>2</sup>                  | Unknown | Unknown |
| 2.9  | 48  | Pancreas           | Hypervolaemic | Unknown <sup>2</sup>                  | N/A     | Unknown |
| 1.9  | 45  | Lung               | Unknown       | Fluid restriction +<br>demeclocycline | Unknown | Unknown |
| 8.6  | 129 | Colorectal         | Hypovolaemic  | IV saline                             | N/A     | Unknown |
| 8.0  | 172 | Renal              | Unknown       | Unknown <sup>2</sup>                  | Unknown | Unknown |
| 2.0  | 40  | Lung               | Unknown       | IV saline                             | Yes     | No      |
| 9.7  | 60  | Oesophagus         | Unknown       | IV saline                             | Yes     | No      |
| 2.0  | 45  | Lung               | Unknown       | IV saline                             | Yes     | No      |
| 4.2  | 68  | Liver              | Unknown       | Unknown <sup>2</sup>                  | Yes     | Yes     |

|      |     |            |               |                      |         |         |
|------|-----|------------|---------------|----------------------|---------|---------|
| 5.1  | 50  | Oesophagus | Unknown       | Unknown <sup>2</sup> | Unknown | Unknown |
| 7.7  | 153 | Anus       | Unknown       | None                 | No      | Unknown |
| 3.7  | 71  | Cervix     | Hypervolaemic | IV saline            | N/A     | Unknown |
| 3.0  | 36  | Breast     | Unknown       | Unknown <sup>2</sup> | Unknown | Unknown |
| 6.4  | 90  | Lymphoma   | Unknown       | IV saline            | No      | Yes     |
| 54.5 | 463 | Colorectal | Unknown       | IV saline            | No      | No      |
| 36.9 | 155 | Bladder    | Hypovolaemic  | IV saline            | N/A     | Unknown |
| 15.6 | 152 | Ovary      | Hypovolaemic  | IV saline            | N/A     | Yes     |
| 1.3  | 64  | Gastric    | Unknown       | Unknown <sup>2</sup> | Unknown | Yes     |

1. Defined as Plasma Osmolality <270mOsmol/L with Urine Osmolality >100 mOsmol/L
2. Treatment unknown but not IV saline or demeclocycline
3. Cancer of Unknown Primary
